# Supplementary material for: Syntheses, structures, magnetic and luminescence properties of a series of coordination polymers constructed from 1,4-naphthalenedicarboxylate and N-donor ligands
Source: Royal Society of Chemistry journal article supplement (doi:10.1039/c5ce00539f), 2015-01-01
Supplement: c5ce00539f1.pdf [file c5ce00539f1.pdf]

## Electronic Supplementary Information (ESI)

### **Syntheses, structures, magnetic and luminescent properties of a series of coordination polymers constructed from 1,4-naphthalenedicarboxylic and N-donor ligands**

*Liu Yang, Chao Qin,\* Bai-Qiao Song, Xiao Li, Chun-Gang Wang and Zhong-Min Su\**

*Institute of Functional Material Chemistry, Key Lab of Polyoxometalate Science of Ministry of Education, Faculty of Chemistry, Northeast Normal University, Changchun, 130024 Jilin, People's Republic of China.*

\*E-mail: zmsu@nenu.edu.cn

## Table of Contents

|                                                                                                                                                                                                        |    |
|--------------------------------------------------------------------------------------------------------------------------------------------------------------------------------------------------------|----|
| <b>Table S1</b> Selected Bonds Lengths (Å) and Angles (°) for compounds <b>1-5</b> . .....                                                                                                             | S3 |
| <b>Fig. S1</b> Experimental (red) and simulated (black) PXRD patterns for compound <b>1(a)</b> ; compound <b>2 (b)</b> ; compound <b>3 (c)</b> ; compound <b>4 (d)</b> ; compound <b>5 (e)</b> . ..... | S6 |
| <b>Fig. S2</b> The TGA curves for compounds <b>1-5</b> . .....                                                                                                                                         | S8 |

**Table S1. Selected Bonds Lengths (Å) and Angles (°) for compounds 1-5**

---

| Compound 1        |            |                  |            |
|-------------------|------------|------------------|------------|
| Cd(1)-O(8C)       | 2.232(3)   | Cd(1)-O(7B)      | 2.241(3)   |
| Cd(1)-N(3)        | 2.309(4)   | Cd(1)-N(4)       | 2.339(4)   |
| Cd(1)-O(1)        | 2.343(3)   | Cd(1)-O(2)       | 2.410(3)   |
| Cd(2)-O(6)        | 2.208(3)   | Cd(2)-O(5A)      | 2.252(3)   |
| Cd(2)-N(2)        | 2.337(4)   | Cd(2)-N(1)       | 2.347(4)   |
| Cd(2)-O(4)        | 2.372(3)   | Cd(2)-O(3)       | 2.389(4)   |
| O(8C)-Cd(1)-O(7B) | 99.48(12)  | O(8C)-Cd(1)-N(3) | 102.71(12) |
| O(7B)-Cd(1)-N(3)  | 85.26(13)  | O(8C)-Cd(1)-N(4) | 87.80(13)  |
| O(7B)-Cd(1)-N(4)  | 155.90(13) | N(3)-Cd(1)-N(4)  | 70.69(14)  |
| O(8C)-Cd(1)-O(1)  | 91.53(12)  | O(7B)-Cd(1)-O(1) | 116.80(12) |
| N(3)-Cd(1)-O(1)   | 151.62(14) | N(4)-Cd(1)-O(1)  | 85.68(13)  |
| O(8C)-Cd(1)-O(2)  | 138.98(11) | O(7B)-Cd(1)-O(2) | 80.29(12)  |
| N(3)-Cd(1)-O(2)   | 118.03(13) | N(4)-Cd(1)-O(2)  | 109.09(13) |
| O(1)-Cd(1)-O(2)   | 54.55(11)  | O(6)-Cd(2)-O(5A) | 110.87(14) |
| O(6)-Cd(2)-N(2)   | 85.34(13)  | O(5A)-Cd(2)-N(2) | 84.53(12)  |
| O(6)-Cd(2)-N(1)   | 139.76(15) | O(5A)-Cd(2)-N(1) | 98.37(14)  |
| N(2)-Cd(2)-N(1)   | 70.16(13)  | O(6)-Cd(2)-O(4)  | 108.09(13) |
| O(5A)-Cd(2)-O(4)  | 84.88(12)  | N(2)-Cd(2)-O(4)  | 165.24(12) |
| N(1)-Cd(2)-O(4)   | 101.32(13) | O(6)-Cd(2)-O(3)  | 85.82(15)  |
| O(5A)-Cd(2)-O(3)  | 139.29(13) | N(2)-Cd(2)-O(3)  | 135.07(14) |
| N(1)-Cd(2)-O(3)   | 89.64(14)  | O(4)-Cd(2)-O(3)  | 54.42(13)  |

  

| Compound 2        |            |                   |            |
|-------------------|------------|-------------------|------------|
| Cd(1)-O(2)        | 2.307(3)   | Cd(1)-N(2)        | 2.341(3)   |
| Cd(1)-N(1)        | 2.345(3)   | Cd(1)-O(4B)       | 2.347(3)   |
| Cd(1)-O(1A)       | 2.416(3)   | Cd(1)-O(3B)       | 2.425(3)   |
| Cd(1)-O(2A)       | 2.464(3)   | O(2)-Cd(1)-N(2)   | 86.87(10)  |
| O(2)-Cd(1)-N(1)   | 107.20(10) | N(2)-Cd(1)-N(1)   | 71.14(12)  |
| O(2)-Cd(1)-O(4B)  | 134.22(10) | N(2)-Cd(1)-O(4B)  | 138.87(10) |
| N(1)-Cd(1)-O(4B)  | 90.67(10)  | O(2)-Cd(1)-O(1A)  | 116.39(11) |
| N(2)-Cd(1)-O(1A)  | 81.12(10)  | N(1)-Cd(1)-O(1A)  | 126.26(11) |
| O(4B)-Cd(1)-O(1A) | 80.99(11)  | O(2)-Cd(1)-O(3B)  | 82.07(9)   |
| N(2)-Cd(1)-O(3B)  | 156.61(10) | N(1)-Cd(1)-O(3B)  | 92.50(11)  |
| O(4B)-Cd(1)-O(3B) | 54.72(10)  | O(1A)-Cd(1)-O(3B) | 122.27(9)  |
| O(2)-Cd(1)-O(2A)  | 76.96(10)  | N(2)-Cd(1)-O(2A)  | 113.99(11) |
| N(1)-Cd(1)-O(2A)  | 173.87(10) | O(4B)-Cd(1)-O(2A) | 83.23(9)   |
| O(1A)-Cd(1)-O(2A) | 53.38(9)   | O(3B)-Cd(1)-O(2A) | 83.54(9)   |

  

| Compound 3       |            |                   |            |
|------------------|------------|-------------------|------------|
| Cu(1)-O(8B)      | 1.9318(19) | Cu(1)-O(6)        | 1.9361(19) |
| Cu(1)-O(1)       | 2.021(2)   | Cu(1)-O(3A)       | 2.042(2)   |
| Cu(1)-N(4C)      | 2.145(3)   | Cu(2)-O(2)        | 1.919(2)   |
| Cu(2)-O(4A)      | 1.927(2)   | Cu(2)-O(7B)       | 2.027(2)   |
| Cu(2)-O(5)       | 2.0552(19) | Cu(2)-N(1)        | 2.115(3)   |
| O(8B)-Cu(1)-O(6) | 173.77(9)  | O(8B)-Cu(1)-O(1)  | 87.65(9)   |
| O(6)-Cu(1)-O(1)  | 88.54(9)   | O(8B)-Cu(1)-O(3A) | 90.01(9)   |
| O(6)-Cu(1)-O(3A) | 91.57(9)   | O(1)-Cu(1)-O(3A)  | 157.03(9)  |

---

|                   |            |                   |           |
|-------------------|------------|-------------------|-----------|
| O(8B)-Cu(1)-N(4C) | 99.74(10)  | O(6)-Cu(1)-N(4C)  | 86.26(10) |
| O(1)-Cu(1)-N(4C)  | 111.93(10) | O(3A)-Cu(1)-N(4C) | 90.98(10) |
| O(2)-Cu(2)-O(4A)  | 174.17(10) | O(2)-Cu(2)-O(7B)  | 89.28(10) |
| O(4A)-Cu(2)-O(7B) | 89.75(10)  | O(2)-Cu(2)-O(5)   | 89.18(9)  |
| O(4A)-Cu(2)-O(5)  | 89.47(9)   | O(7B)-Cu(2)-O(5)  | 156.97(9) |
| O(2)-Cu(2)-N(1)   | 89.17(10)  | O(4A)-Cu(2)-N(1)  | 96.59(10) |
| O(7B)-Cu(2)-N(1)  | 108.91(10) | O(5)-Cu(2)-N(1)   | 94.05(10) |

Compound 4

|                   |            |                   |            |
|-------------------|------------|-------------------|------------|
| O(6)-Co(1)        | 2.0689(18) | O(7)-Co(1)        | 2.1265(18) |
| Co(1)-O(6B)       | 2.0689(18) | Co(1)-O(7B)       | 2.1265(18) |
| Co(1)-O(8C)       | 2.0884(19) | Co(1)-O(8D)       | 2.0884(19) |
| O(3)-Co(2)        | 2.053(2)   | O(5)-Co(2)        | 2.046(2)   |
| O(7)-Co(2)        | 2.2103(19) | Co(2)-O(1A)       | 2.046(2)   |
| Co(2)-O(9C)       | 2.046(2)   | N(1)-Co(2)        | 2.108(2)   |
| Co(1)-O(7)-Co(2)  | 112.43(8)  | O(6B)-Co(1)-O(6)  | 180.00     |
| O(6B)-Co(1)-O(8C) | 86.00(8)   | O(6)-Co(1)-O(8C)  | 94.00(8)   |
| O(6B)-Co(1)-O(8D) | 94.00(8)   | O(6)-Co(1)-O(8D)  | 86.00(8)   |
| O(8C)-Co(1)-O(8D) | 180.00     | O(6B)-Co(1)-O(7)  | 89.04(7)   |
| O(6)-Co(1)-O(7)   | 90.96(7)   | O(8C)-Co(1)-O(7)  | 93.80(8)   |
| O(8D)-Co(1)-O(7)  | 86.20(8)   | O(6B)-Co(1)-O(7B) | 90.96(7)   |
| O(6)-Co(1)-O(7B)  | 89.04(7)   | O(8C)-Co(1)-O(7B) | 86.20(8)   |
| O(8D)-Co(1)-O(7B) | 93.80(8)   | O(7)-Co(1)-O(7B)  | 180.00     |
| O(9C)-Co(2)-O(1A) | 88.98(15)  | O(9C)-Co(2)-O(5)  | 90.12(13)  |
| O(1A)-Co(2)-O(5)  | 176.81(10) | O(9C)-Co(2)-O(3)  | 172.37(10) |
| O(1A)-Co(2)-O(3)  | 90.86(14)  | O(5)-Co(2)-O(3)   | 90.43(12)  |
| O(9C)-Co(2)-N(1)  | 85.17(9)   | O(1A)-Co(2)-N(1)  | 88.55(10)  |
| O(5)-Co(2)-N(1)   | 94.42(9)   | O(3)-Co(2)-N(1)   | 87.20(10)  |
| O(9C)-Co(2)-O(7)  | 98.38(8)   | O(1A)-Co(2)-O(7)  | 88.01(8)   |
| O(5)-Co(2)-O(7)   | 89.09(8)   | O(3)-Co(2)-O(7)   | 89.24(8)   |
| N(1)-Co(2)-O(7)   | 175.01(8)  |                   |            |

Compound 5

|                   |            |                   |            |
|-------------------|------------|-------------------|------------|
| Cd(1)-O(1)        | 2.370(5)   | Cd(1)-O(2)        | 2.437(5)   |
| Cd(1)-O(5)        | 2.482(5)   | Cd(1)-O(8)        | 2.500(7)   |
| Cd(1)-O(9)        | 2.571(8)   | Cd(1)-N(2)        | 2.252(5)   |
| Cd(1)-N(3A)       | 2.39(5)    | Cd(2)-O(5)        | 2.439(5)   |
| Cd(2)-O(3B)       | 2.367(5)   | Cd(2)-O(4B)       | 2.376(5)   |
| Cd(2)-N(5)        | 2.260(5)   | Cd(2)-N(8A)       | 2.21(5)    |
| N(3A)-Cd(1)-N(2)  | 166.1(14)  | N(3A)-Cd(1)-O(1)  | 95.5(15)   |
| N(2)-Cd(1)-O(1)   | 96.31(18)  | N(3A)-Cd(1)-O(2)  | 86.1(14)   |
| N(2)-Cd(1)-O(2)   | 106.83(17) | O(1)-Cd(1)-O(2)   | 54.06(16)  |
| N(3A)-Cd(1)-O(5)  | 83.6(15)   | N(2)-Cd(1)-O(5)   | 86.71(17)  |
| O(1)-Cd(1)-O(5)   | 165.59(16) | N(3A)-Cd(1)-O(8)  | 80.6(14)   |
| O(2)-Cd(1)-O(5)   | 111.57(16) | N(2)-Cd(1)-O(8)   | 86.39(19)  |
| O(1)-Cd(1)-O(8)   | 127.82(19) | O(2)-Cd(1)-O(8)   | 166.64(19) |
| O(5)-Cd(1)-O(8)   | 66.34(19)  | N(2)-Cd(1)-O(9)   | 94.6(2)    |
| O(1)-Cd(1)-O(9)   | 79.50(18)  | N(3A)-Cd(1)-O(9)  | 82.2(13)   |
| O(2)-Cd(1)-O(9)   | 129.97(18) | O(5)-Cd(1)-O(9)   | 114.40(17) |
| O(8)-Cd(1)-O(9)   | 48.41(19)  | N(8A)-Cd(2)-N(5)  | 168.5(16)  |
| N(8A)-Cd(2)-O(11) | 89.4(15)   | N(5)-Cd(2)-O(11)  | 83.0(2)    |
| N(8A)-Cd(2)-O(3B) | 92.5(15)   | N(5)-Cd(2)-O(3B)  | 96.36(18)  |
| O(11)-Cd(2)-O(3B) | 171.5(2)   | N(8A)-Cd(2)-O(4B) | 93.7(15)   |
| N(5)-Cd(2)-O(4B)  | 97.48(18)  | O(11)-Cd(2)-O(4B) | 117.6(2)   |
| O(3B)-Cd(2)-O(4B) | 54.09(17)  | N(8A)-Cd(2)-O(5)  | 83.1(18)   |

---

|                  |            |                  |            |
|------------------|------------|------------------|------------|
| N(5)-Cd(2)-O(5)  | 87.05(17)  | O(8A)-Cd(2)-O(5) | 79.9(2)    |
| O(3B)-Cd(2)-O(5) | 108.52(17) | O(4B)-Cd(2)-O(5) | 162.31(17) |

---

Symmetry codes: for compound **1**: (A)  $-x, -y + 1, -z + 1$ ; (B)  $x, y, z - 1$ ; (C)  $-x + 1, -y, -z + 1$ ; for compound **2**: (A)  $-x, -y + 1, -z$ ; (B)  $x - 1/2, -y + 1/2, z - 1/2$ ; for compound **3**: (A)  $x, y - 1, z$ ; (B)  $x - 1/2, -y + 1/2, z - 1/2$ ; (C)  $x - 1/2, -y + 1/2, z + 1/2$ .; for compound **4**: (A)  $-x - 1/2, y - 1/2, -z + 1/2$ ; (B)  $-x, -y, -z$ ; (C)  $-x - 1/2, y - 1/2, -z - 1/2$ ; (D)  $x + 1/2, -y + 1/2, z + 1/2$ ; for compound **5**: (A)  $x - 1, y - 1, z$ ; (B)  $x, -y + 1/2, z - 1/2$ .

(a)

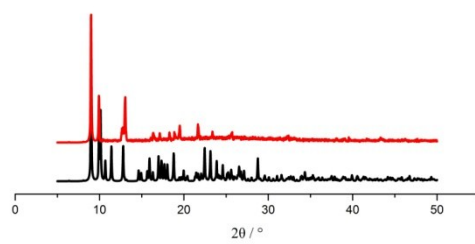

(b)

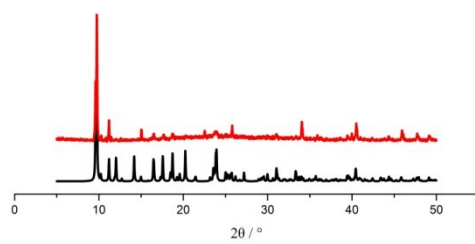

(c)

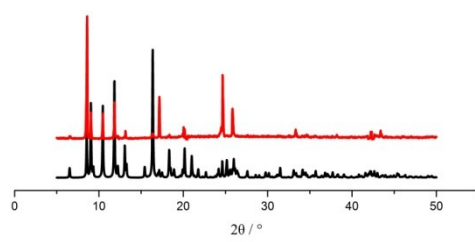

(d)

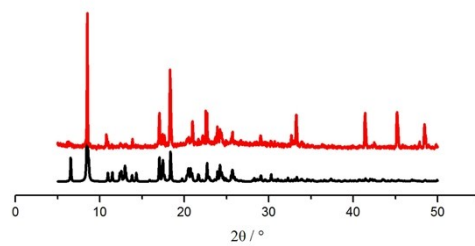

(e)

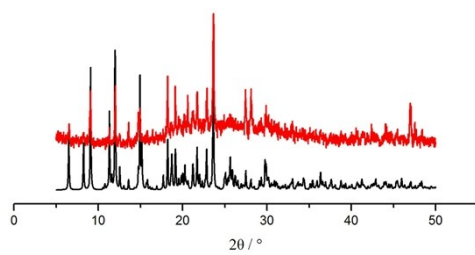

**Fig. S1** Experimental (red) and simulated (black) PXR D patterns for compound **1**(a); compound **2** (b); compound **3** (c); compound **4** (d); compound **5** (e).

(a)

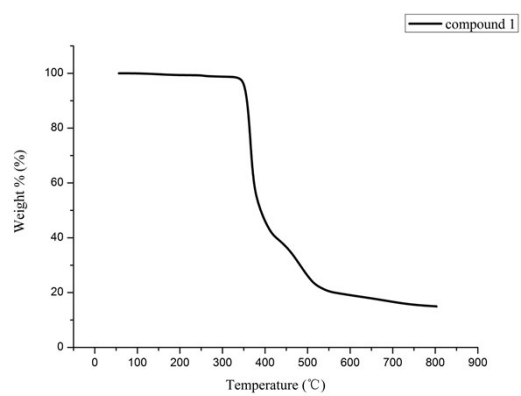

(b)

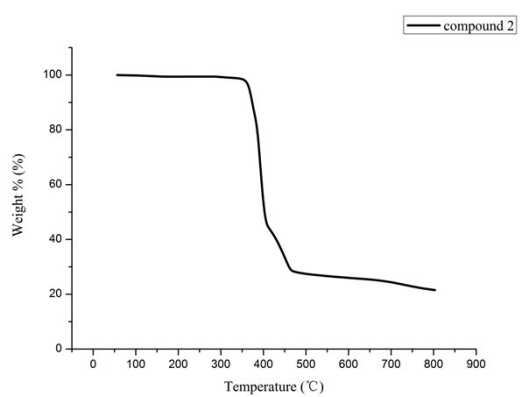

(c)

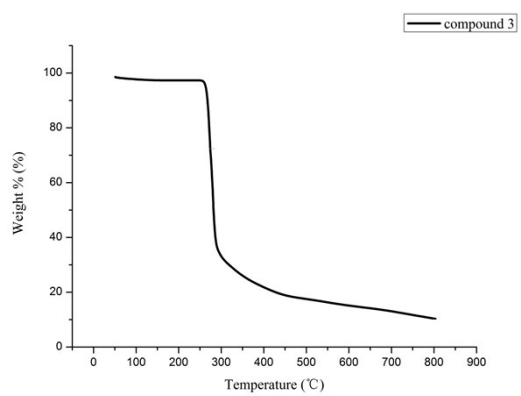



(d)

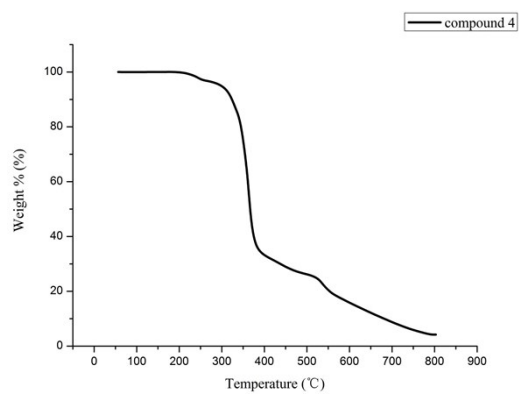

(e)

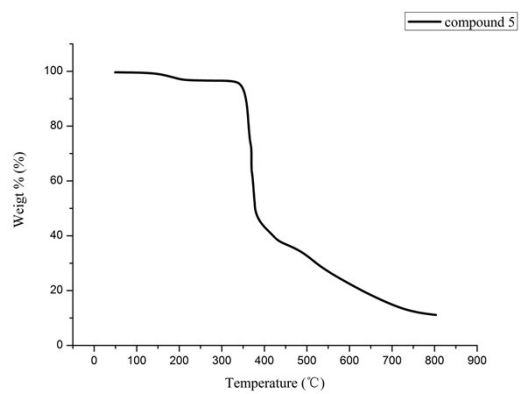

Fig. S2 The TGA curves for compound 1(a); compound 2 (b); compound 3 (c); compound 4 (d); compound 5 (e).
